# Supplementary material for: Establishment of a Rapid and Effective Agrobacterium-Mediated Genetic Transformation System of Oxalis triangularis ‘Purpurea’
Source: MDPI journal article supplement (doi:10.3390/plants12244130), 2023-12-11
Supplement: s1 [file s1]

## Supplementary File

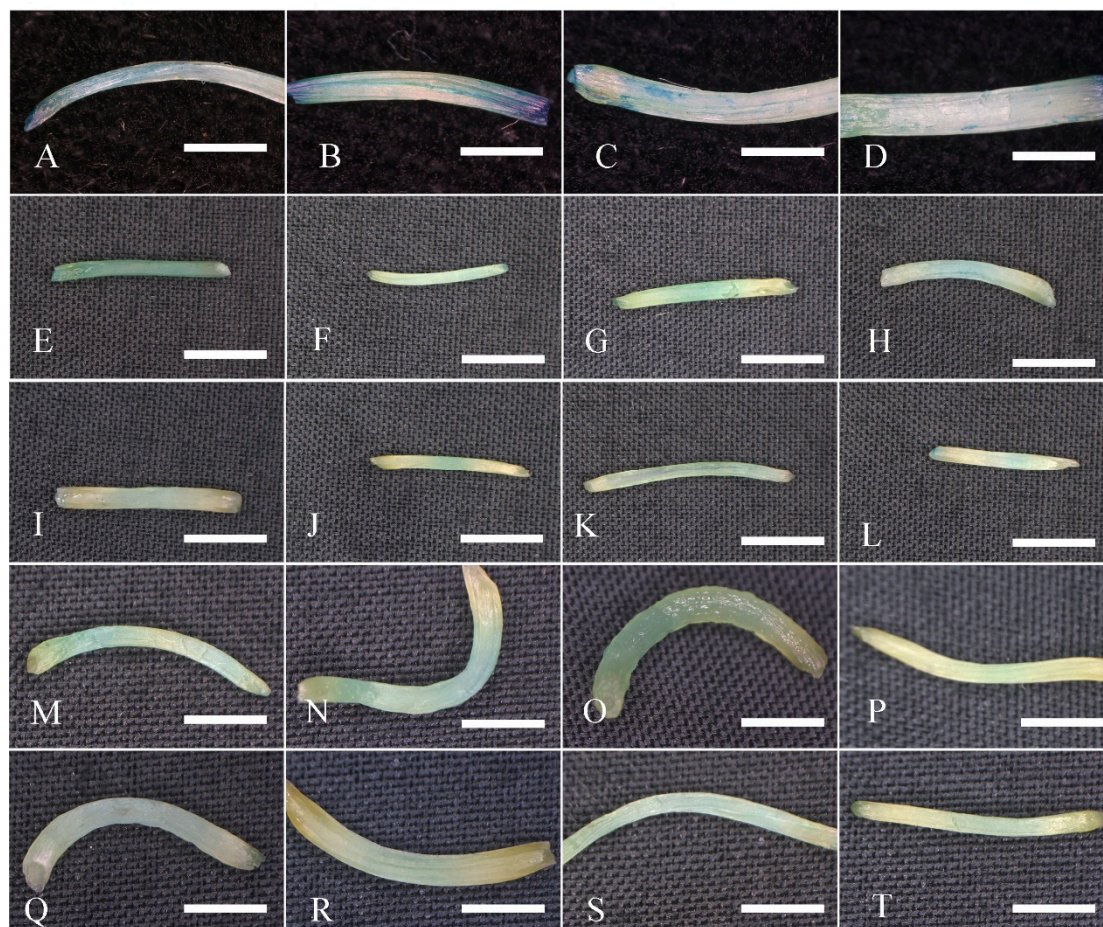

**Figure S1** *GUS* transient expression results at different treatments

A-D: *GUS* staining results at different pre-culture times (2~5 days); E-H: *GUS* staining results of different OD<sub>600</sub> (0.4~1.0); I-L: *GUS* staining results at different infection times (5~20 minutes); M-P: *GUS* staining results at different co-culture times (2~5 days); Q-T: A *GUS* staining results at different AS concentrations (100~400  $\mu$ M). Scale bars = 5 mm.

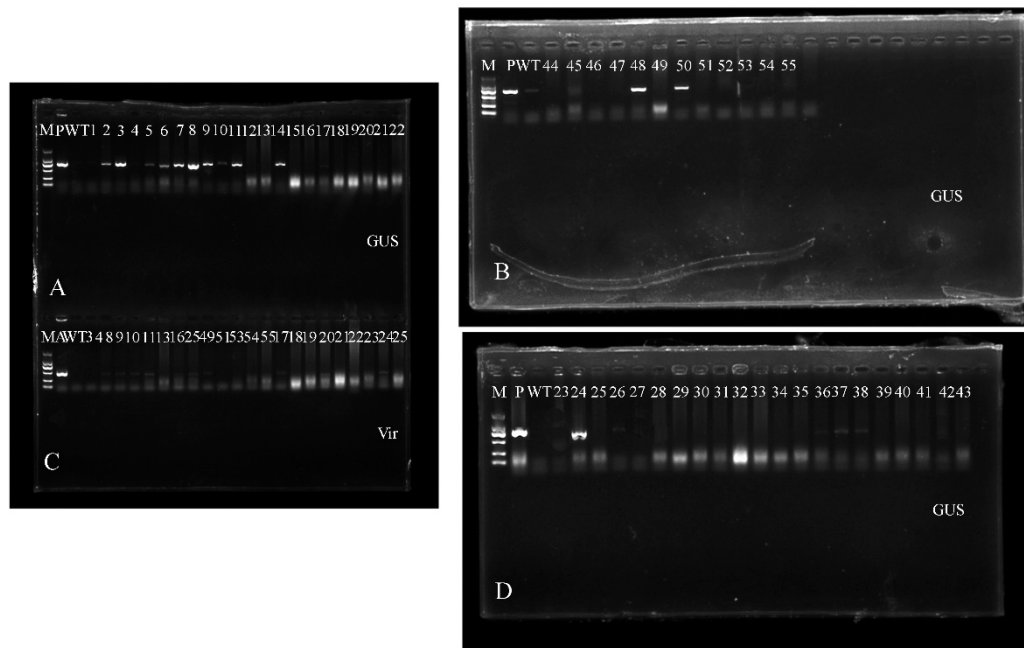

**Figure S2** Identification of transgenic lines by genotyping PCR in hygromycin-resistant lines. (A-B, D) PCR identification of the *GUS* (723 bp) in hygromycin-resistant lines. M: DNA marker 2 Kb, P: Plasmid pCAMBIA1304; WT: Wild type plant; numbers 1-55: hygromycin-resistant plants. (C) The *Vir* gene amplification (450 bp). (all positive transgenic plants and some non-transgenic plants were displayed, and others had no bands amplified). A: the *Agrobacterium*; WT: Wild-type; numbers 2, 3, 6, 7, 8, 9, 11 and 14: Positive plants from treatment 2; number 24: Positive plants from treatment 18; numbers 48 and 50: Positive plants from treatment 7, other numbers are untransformed plants.

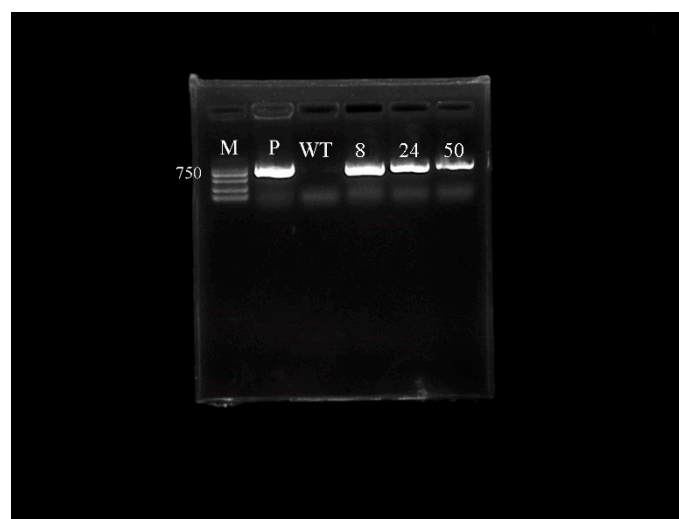

**Figure S3** RT-PCR analysis of *GUS* expression in Wild-type plants and transgenic lines. M: Marker 2000, P: pCAMBIA1304, WT: Wild type, numbers 8, 24 and 50: Transgenic lines from treatment 2, treatment 18, and treatment 7, respectively;

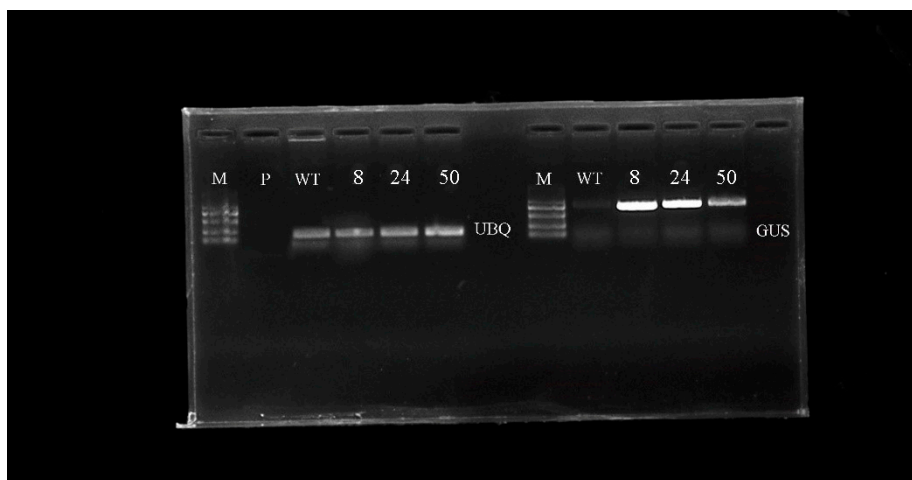

**Figure S4** RT-PCR Result of *UBQ* and *GUS* in Wild-type plants and transgenic lines  
M: Marker 2000, P: pCAMBIA1304, WT: Wild type, numbers 8, 24 and 50: Transgenic lines from treatment 2, treatment 18, and treatment 7, respectively;

**Table S1.** Effects of different hygromycin concentrations on petiole induction in callus

| Hygromycin concentration (mg·L <sup>-1</sup> ) | Bleaching rate (%) | Browning rate (%) | Callus induction rate (%) | Petiole growth state                           |
|------------------------------------------------|--------------------|-------------------|---------------------------|------------------------------------------------|
| 0.00                                           | 0.00               | 0.00              | 100.00±0.00a              | Grow robustly                                  |
| 0.40                                           | 0.00               | 7.78±1.92d        | 92.22±1.92b               | Growth inhibition                              |
| 0.60                                           | 0.00               | 38.88±5.09c       | 61.11±5.09c               | Petiole growth is slow                         |
| 0.80                                           | 0.00               | 65.55±5.09b       | 34.44±5.09d               | The petiole grows slowly and browns            |
| 1.00                                           | 100.00             | 0.00              | 0.00                      | The petiole stops growing, and the albino dies |
| 2.00                                           | 0.00               | 100.00a           | 0.00                      | The petiole stops growing, browns and dies     |

The data are mean ± standard deviation, and different letters in the same column indicate significant differences between treatments (P<0.05), the same as below.
